# Supplementary material for: Curcumin-Piperlongumine Hybrids with a Multitarget Profile Elicit Neuroprotection in In Vitro Models of Oxidative Stress and Hyperphosphorylation
Source: MDPI journal article supplement (doi:10.3390/antiox11010028), 2021-12-24

## *Supporting Information*

### **Multitarget curcumin-piperlongumine hybrids with antioxidant and antiinflammatory properties for the potential treatment of Alzheimer's disease.**

Ángel Cores<sup>1</sup>, Noelia Carmona-Zafra<sup>1</sup>, Olmo Martín-Cámara<sup>1</sup>, Juan Domingo Sánchez<sup>1,2</sup>, Pablo Duarte<sup>2,3</sup>, Mercedes Villacampa<sup>1</sup>, Paloma Bermejo-Bescós<sup>4</sup>, Sagrario Martín-Aragón<sup>4\*</sup>, Rafael León<sup>2\*</sup> and J. Carlos Menéndez<sup>1\*</sup>

<sup>1</sup> Unidad de Química Orgánica y Farmacéutica, Departamento de Química en Ciencias Farmacéuticas, Facultad de Farmacia, Universidad Complutense, 28040 Madrid, Spain.

<sup>2</sup> Instituto de Química Médica, Consejo Superior de Investigaciones Científicas (IQM-CSIC), 28006 Madrid, Spain.

<sup>3</sup> Instituto Teófilo Hernando y Departamento de Bioquímica, Facultad de Medicina, Instituto de Investigaciones Biomédicas 'Alberto Sols' UAM-CSIC, Universidad Autónoma de Madrid, Madrid, Spain.

<sup>4</sup> Departamento de Farmacología, Farmacognosia y Botánica, Facultad de Farmacia, Universidad Complutense, 28040 Madrid, Spain.

## Copies of spectra of new compounds

Methyl 2-methyl-5-oxo-1-(4-fluorophenethyl)-4,5-dihydropyrrole-3-carboxylate (**1a**)

$^1\text{H}$  NMR (250 MHz,  $\text{CDCl}_3$ )

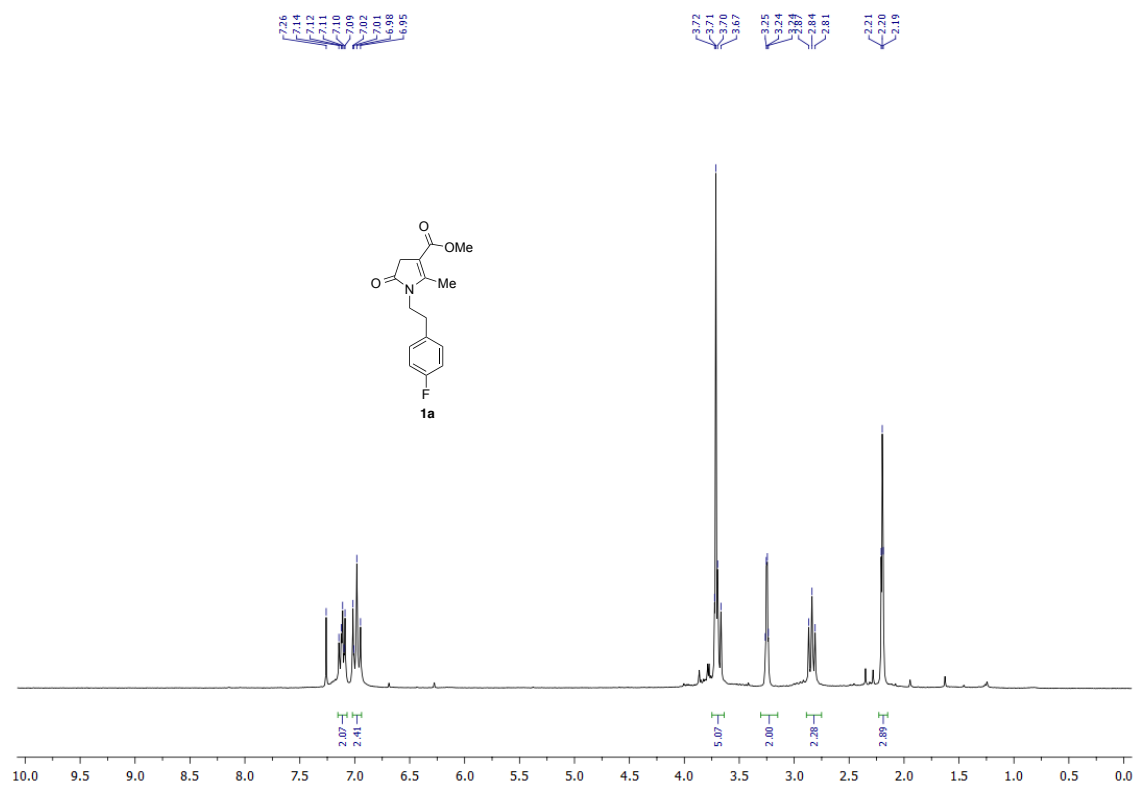

$^{13}\text{C}$  NMR (63 MHz,  $\text{CDCl}_3$ )

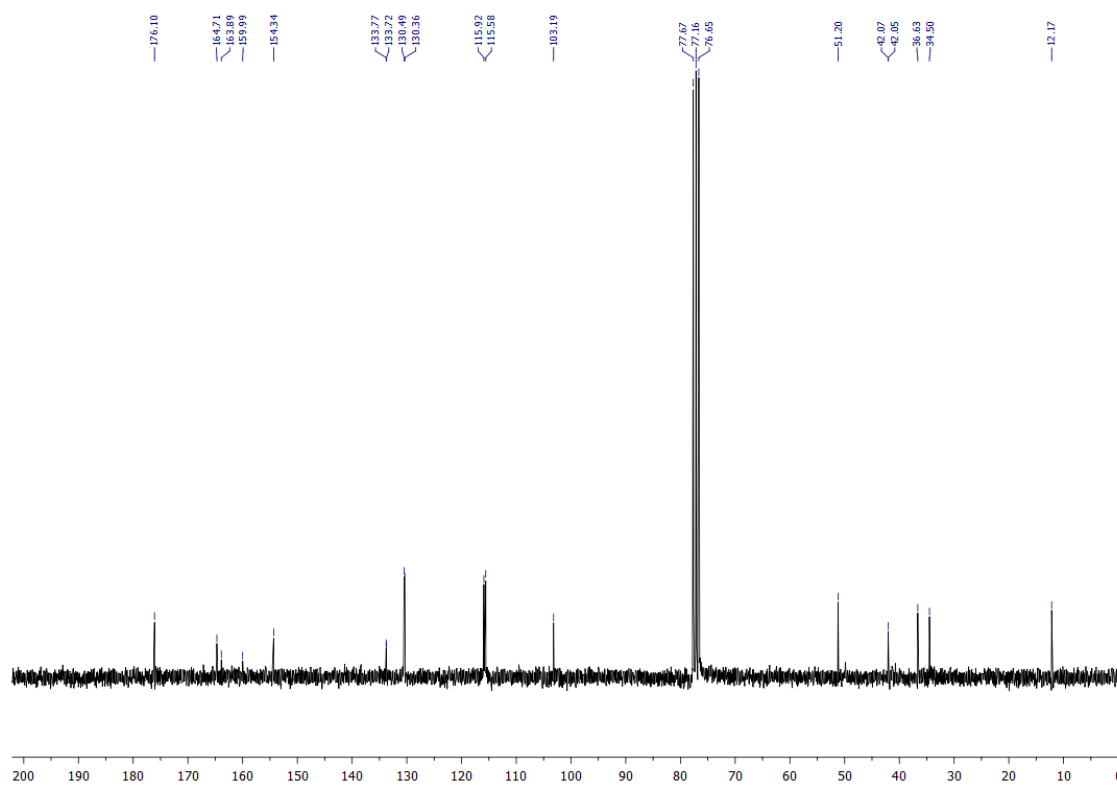

Methyl 1-(4-fluorobenzyl)-2-methyl-5-oxo-4,5-dihydropyrrole-3-carboxylate (**1c**)

<sup>1</sup>H NMR (250 MHz, CDCl<sub>3</sub>)

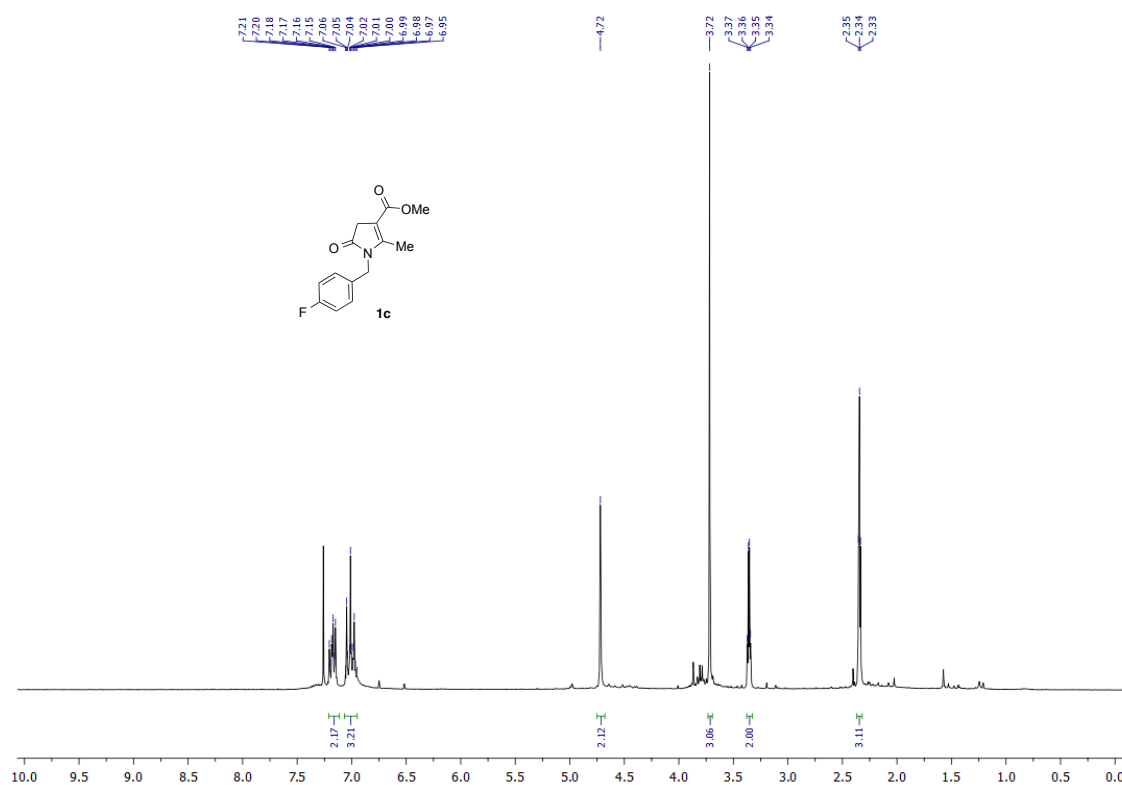

<sup>13</sup>C NMR (63 MHz, CDCl<sub>3</sub>)

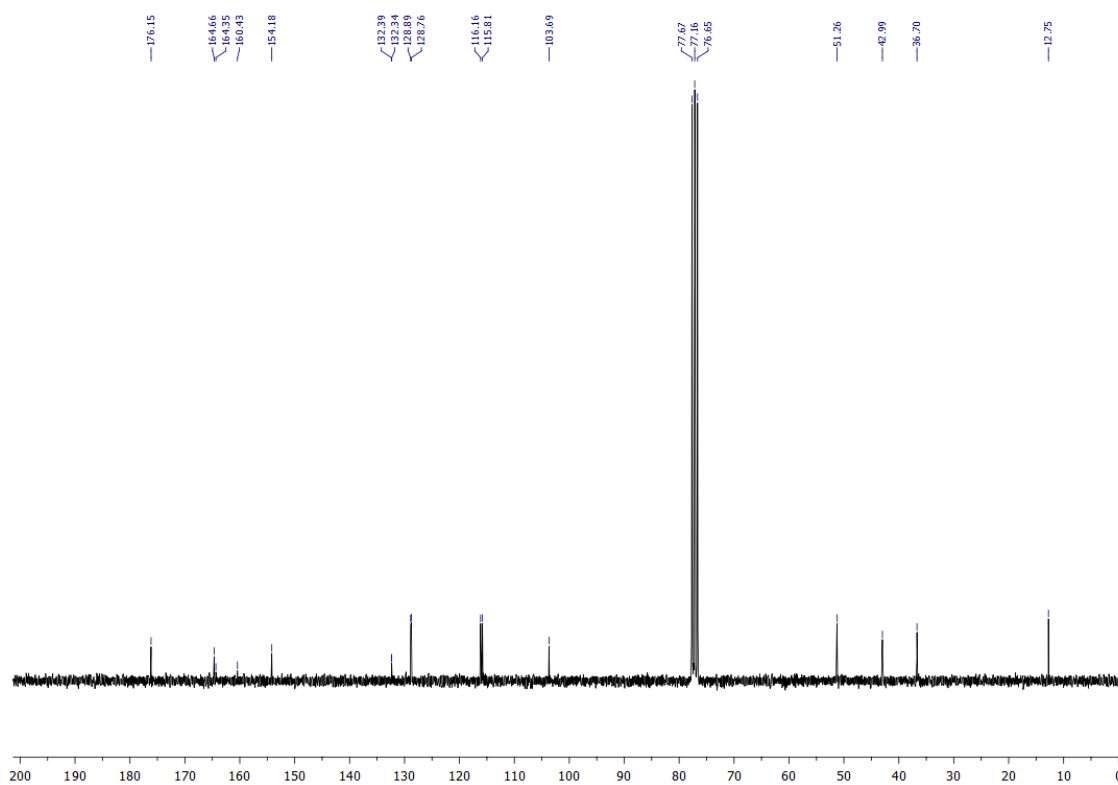

Methyl (Z)-1-(4-fluorophenethyl)-4-((E)-1-hydroxy-3-(3,4,5-trimethoxyphenyl)-allylidene)-2-methyl-5-oxo-4,5-dihydro-1H-pyrrole-3-carboxylate (**2a**)

$^1\text{H}$  NMR (250 MHz,  $\text{CDCl}_3$ )

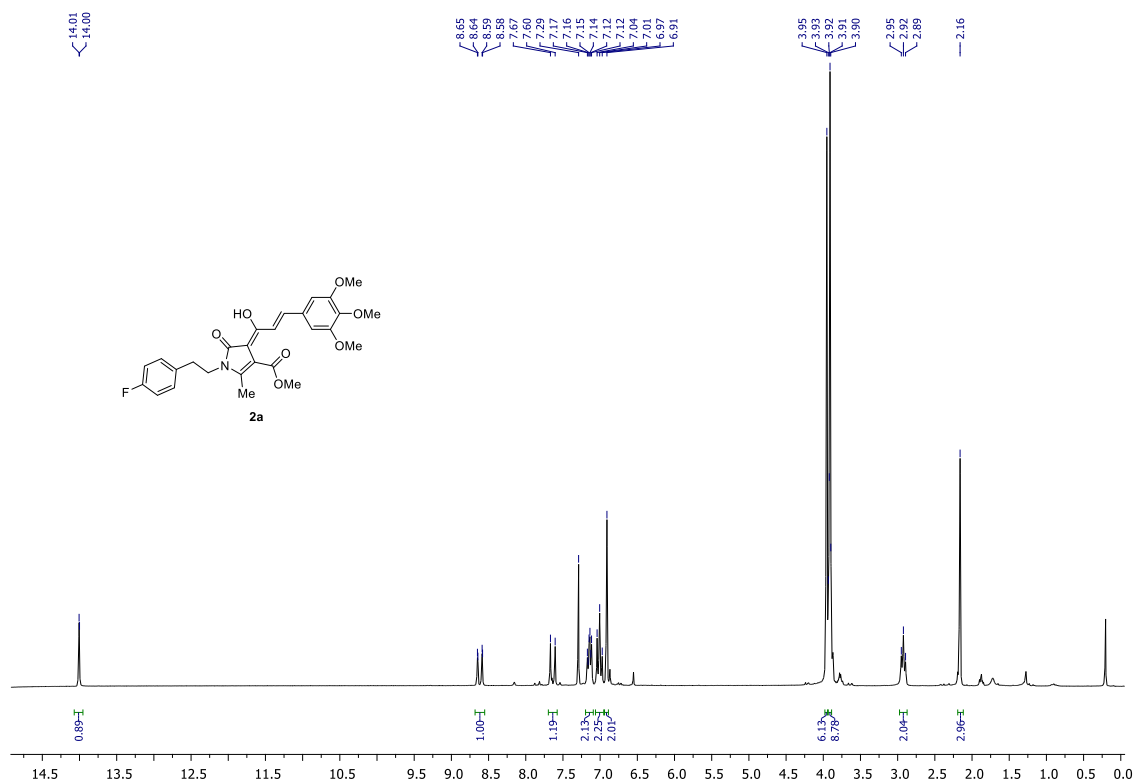

$^{13}\text{C}$  NMR (63 MHz,  $\text{CDCl}_3$ )

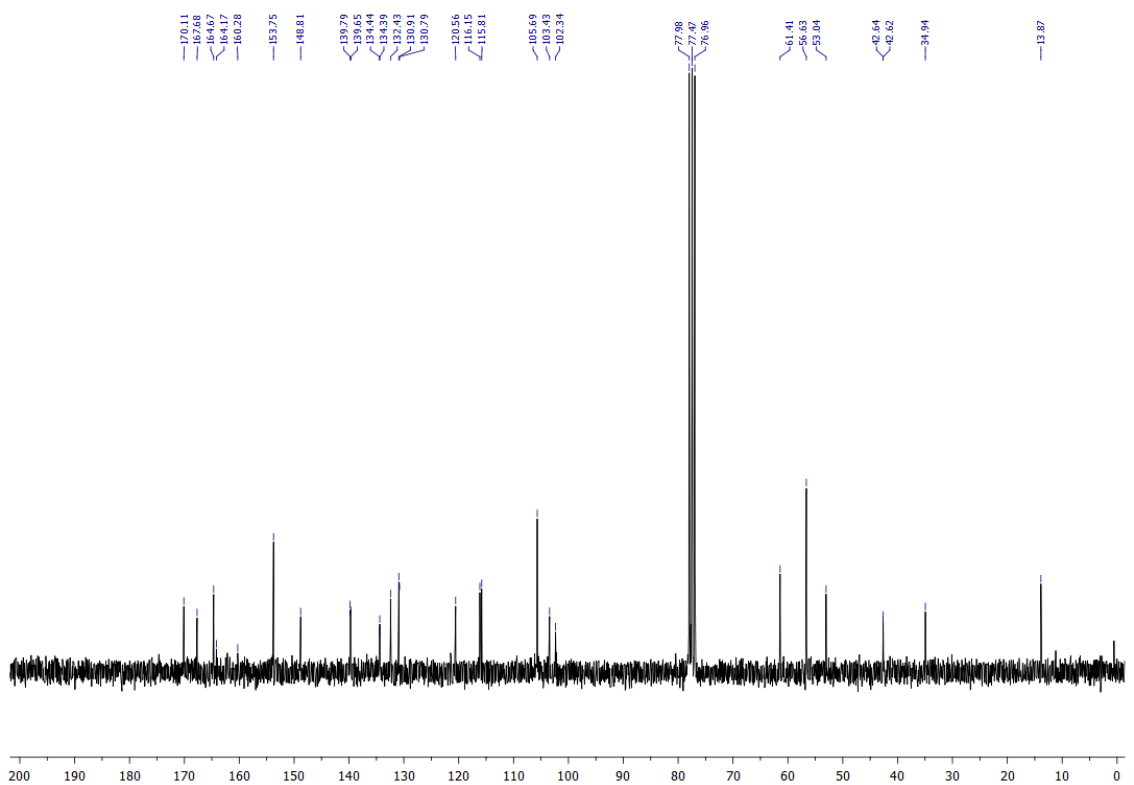

Methyl (Z)-1-butyl-4-((E)-1-hydroxy-3-(3,4,5-trimethoxyphenyl)allylidene)- 2-methyl-5-oxo-4,5-dihydro-1H-pyrrole-3-carboxylate (**2b**)

<sup>1</sup>H NMR (250 MHz, CDCl<sub>3</sub>)

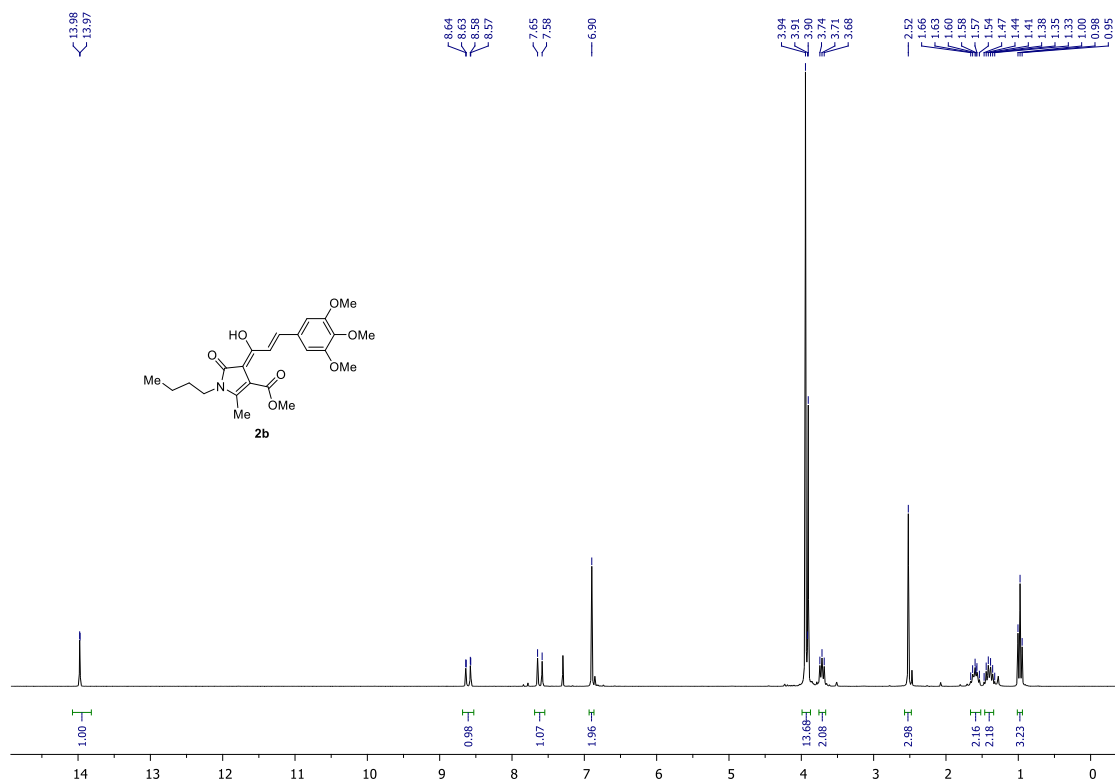

<sup>13</sup>C NMR (63 MHz, CDCl<sub>3</sub>)

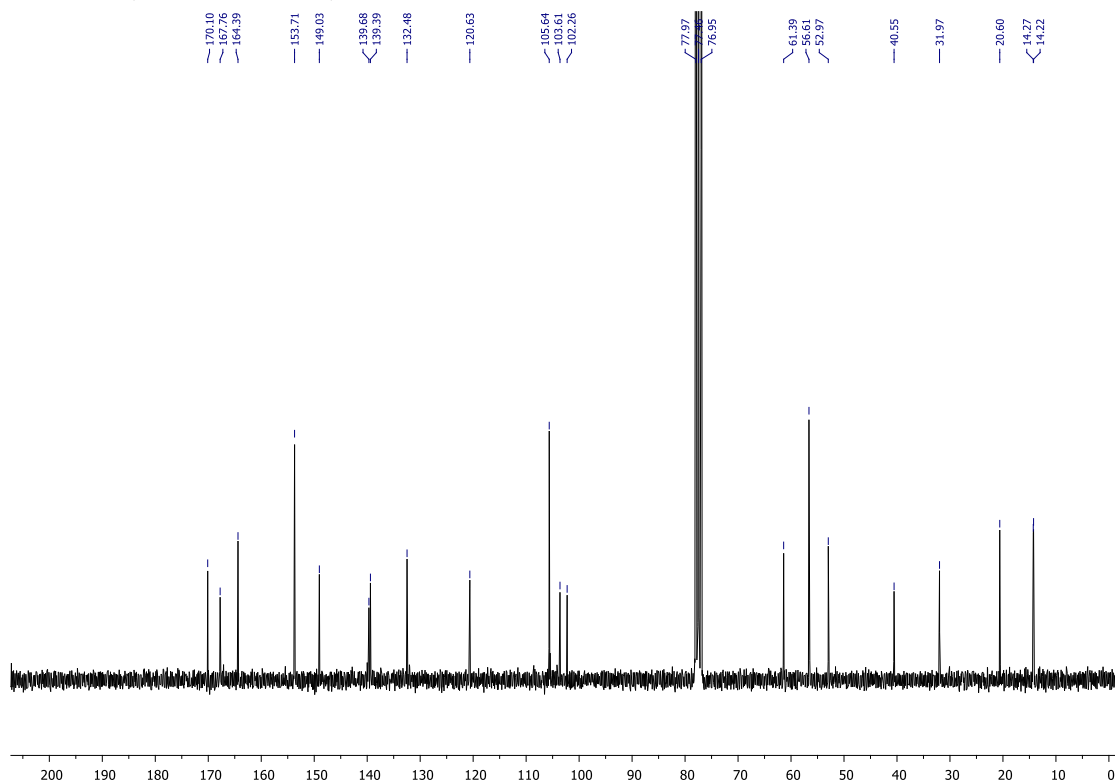

(Z)-1-(4-fluorobenzyl)-4-((E)-1-hydroxy-3-(3,4,5-trimethoxyphenyl)allylidene)-2-methyl-5-oxo-4,5-dihydro-1H-pyrrole-3-carboxylate (**2c**)

<sup>1</sup>H NMR (250 MHz, CDCl<sub>3</sub>)

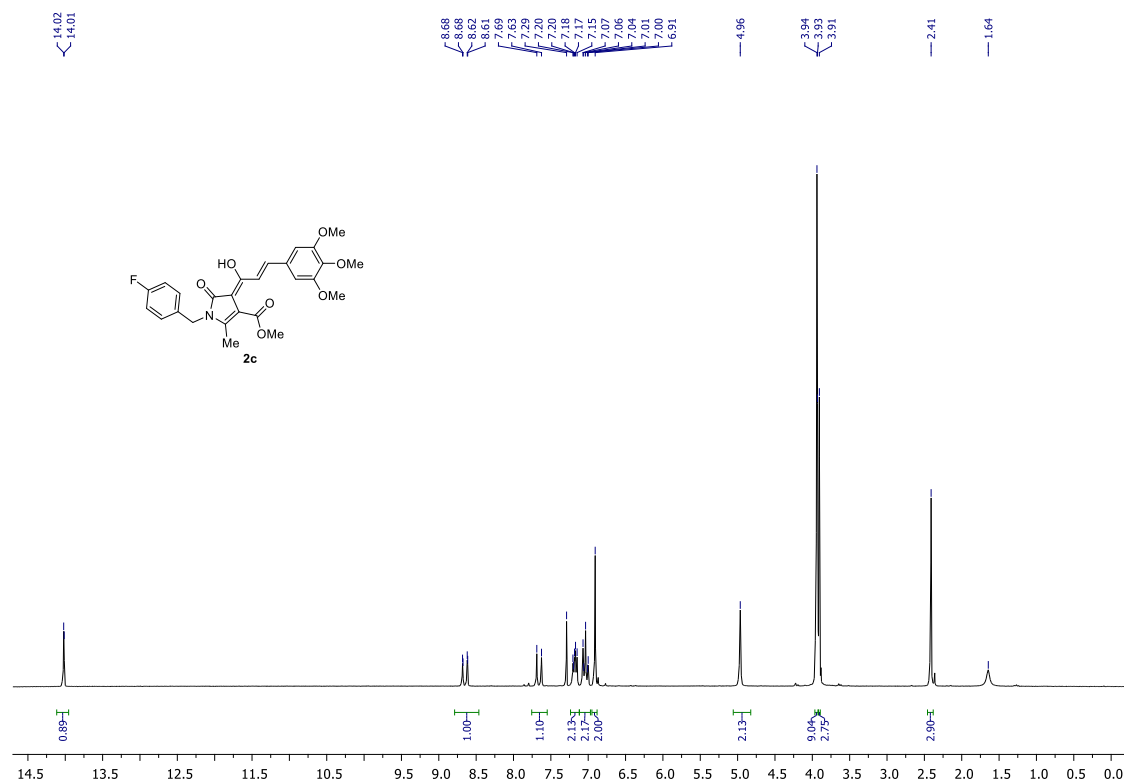

<sup>13</sup>C NMR (63 MHz, CDCl<sub>3</sub>)

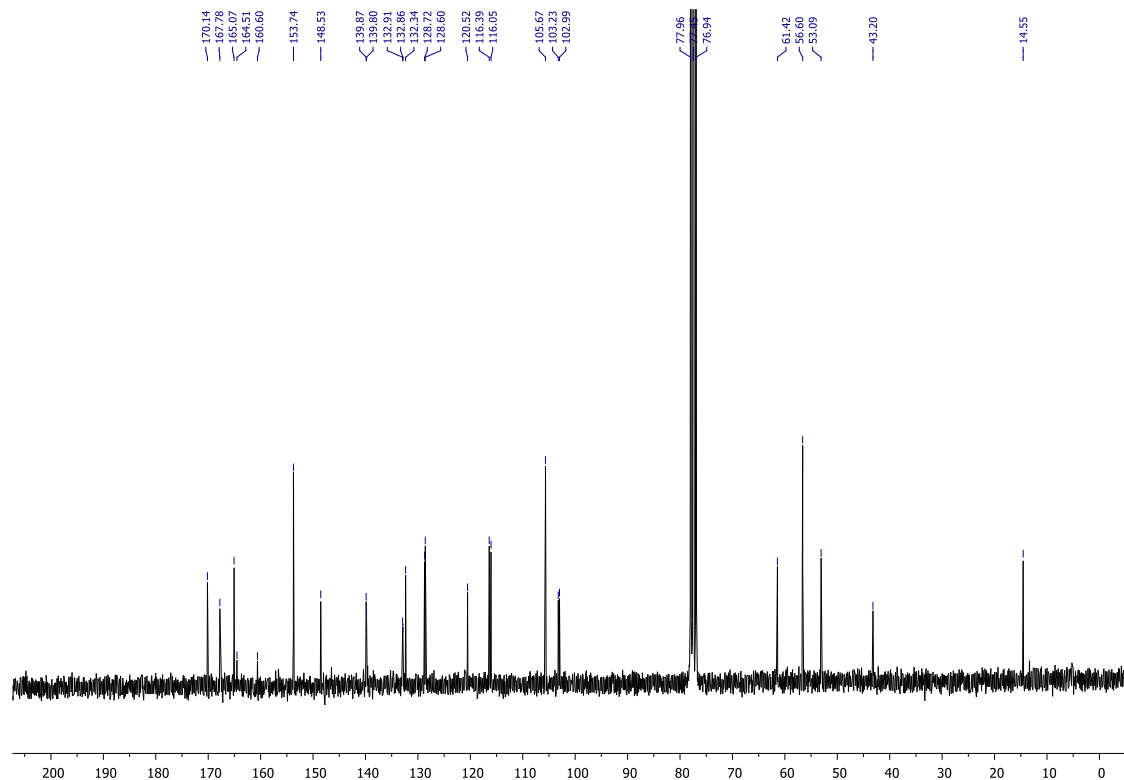

Ethyl (Z)-1-butyl-4-((E)-1-hydroxy-3-(3,4,5-trimethoxyphenyl)allylidene)-2-methyl-5-oxo-4,5-dihydro-1H-pyrrole-3-carboxylate (**2d**)

<sup>1</sup>H NMR (250 MHz, CDCl<sub>3</sub>)

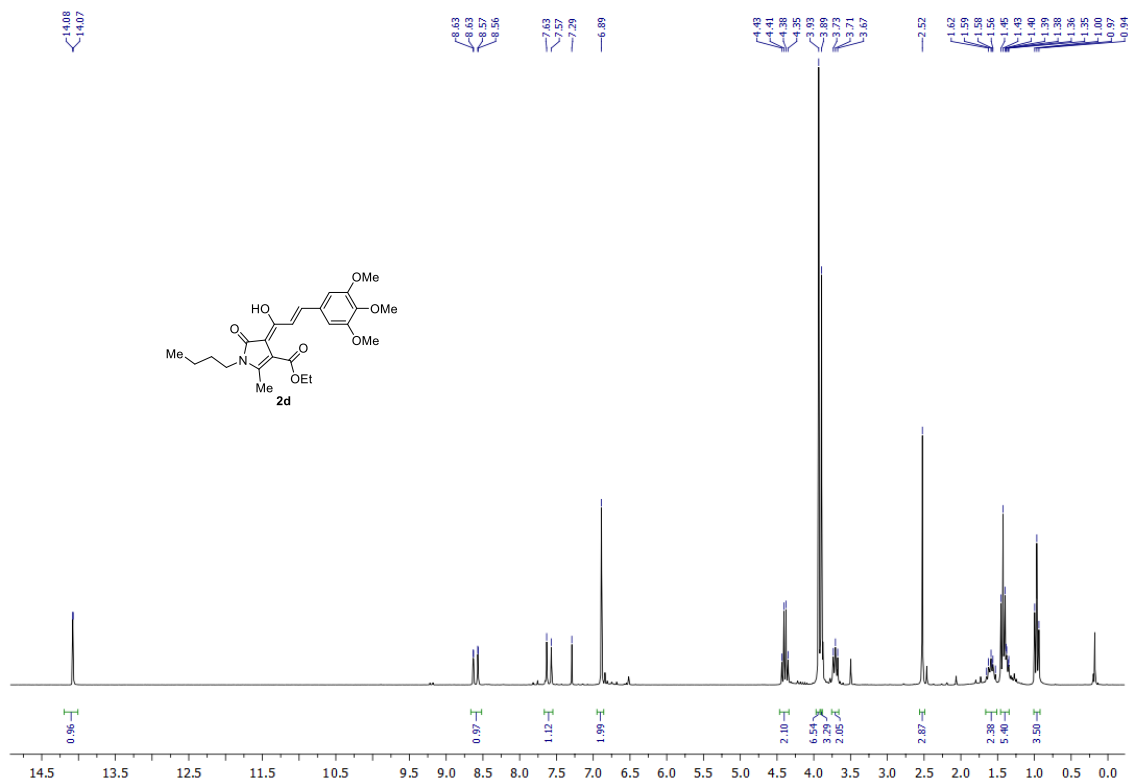

<sup>13</sup>C NMR (63 MHz, CDCl<sub>3</sub>)

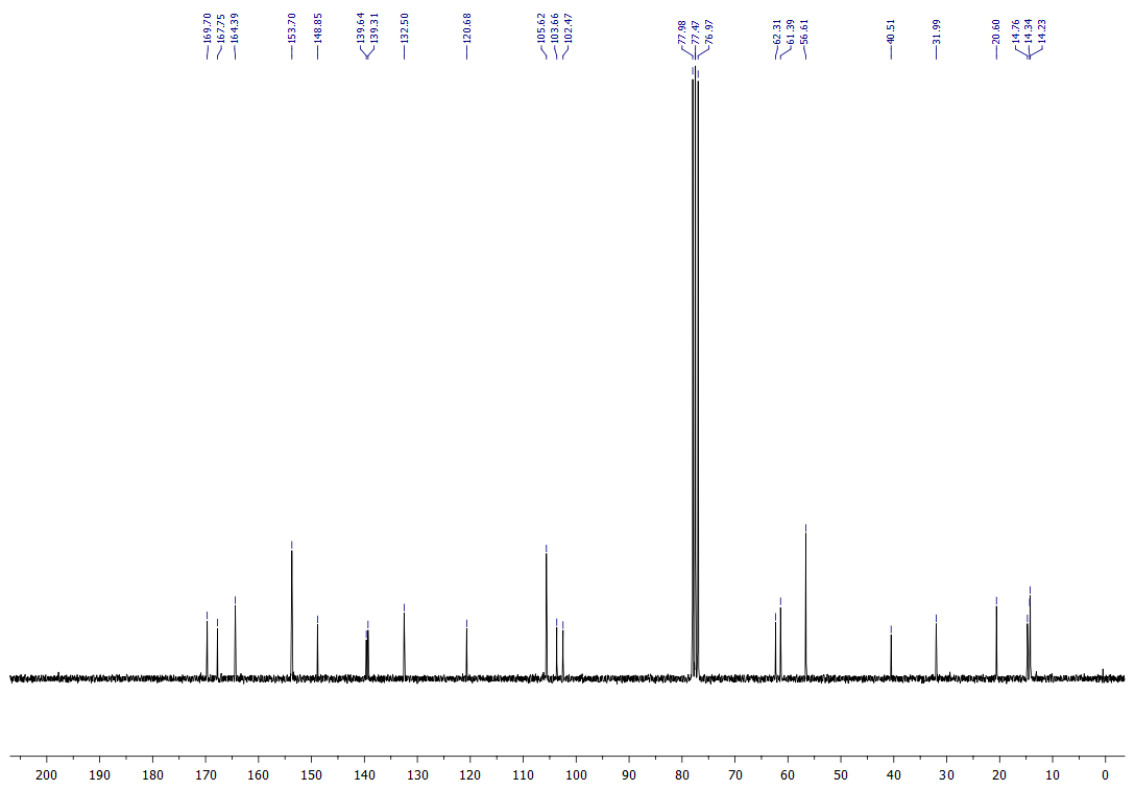

Methyl (Z)-1-butyl-4-((E)-1-hydroxy-3-(4-hydroxy-3-methoxyphenyl)allylidene)-2-methyl-5-oxo-4,5-dihydro-1H-pyrrole-3-carboxylate (**2e**)

<sup>1</sup>H NMR (250 MHz, CDCl<sub>3</sub>)

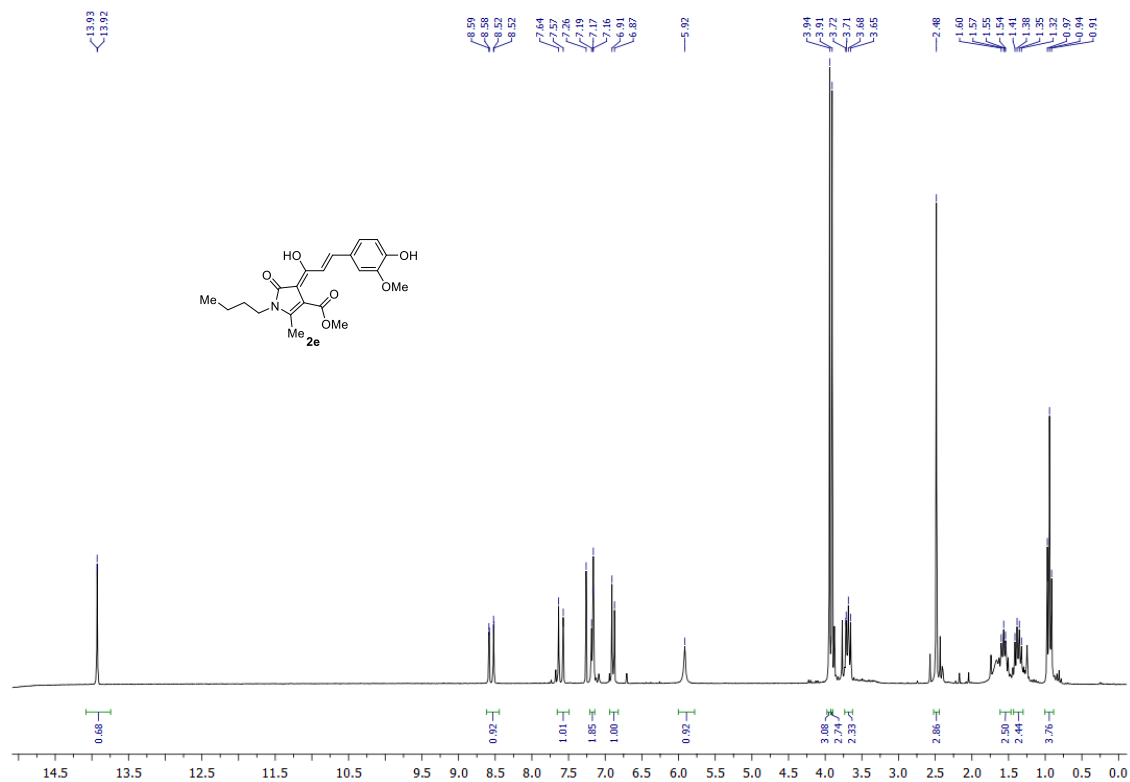

<sup>13</sup>C NMR (63 MHz, CDCl<sub>3</sub>)

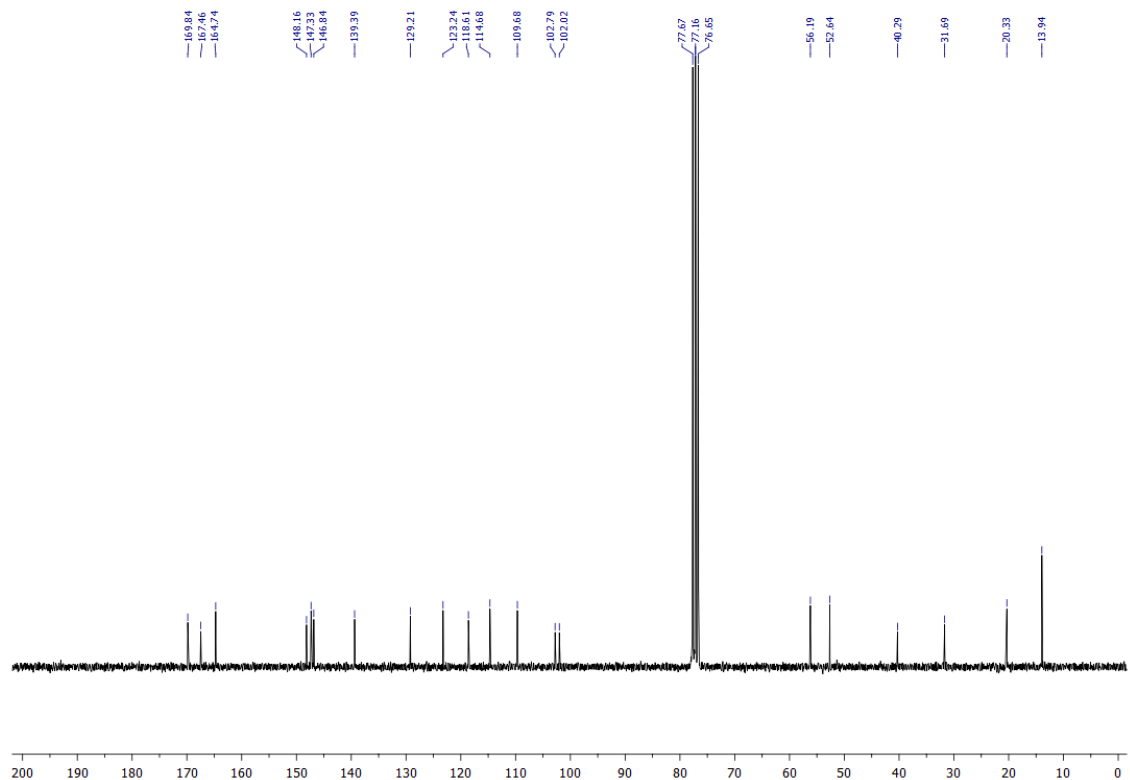



Methyl (Z)-1-benzyl-4-((E)-1-hydroxy-3-(3,4,5-trimethoxyphenyl)allylidene)-2-methyl-5-oxo-4,5-dihydro-1H-pyrrole-3-carboxylate (**2f**)

<sup>1</sup>H NMR (250 MHz, CDCl<sub>3</sub>)

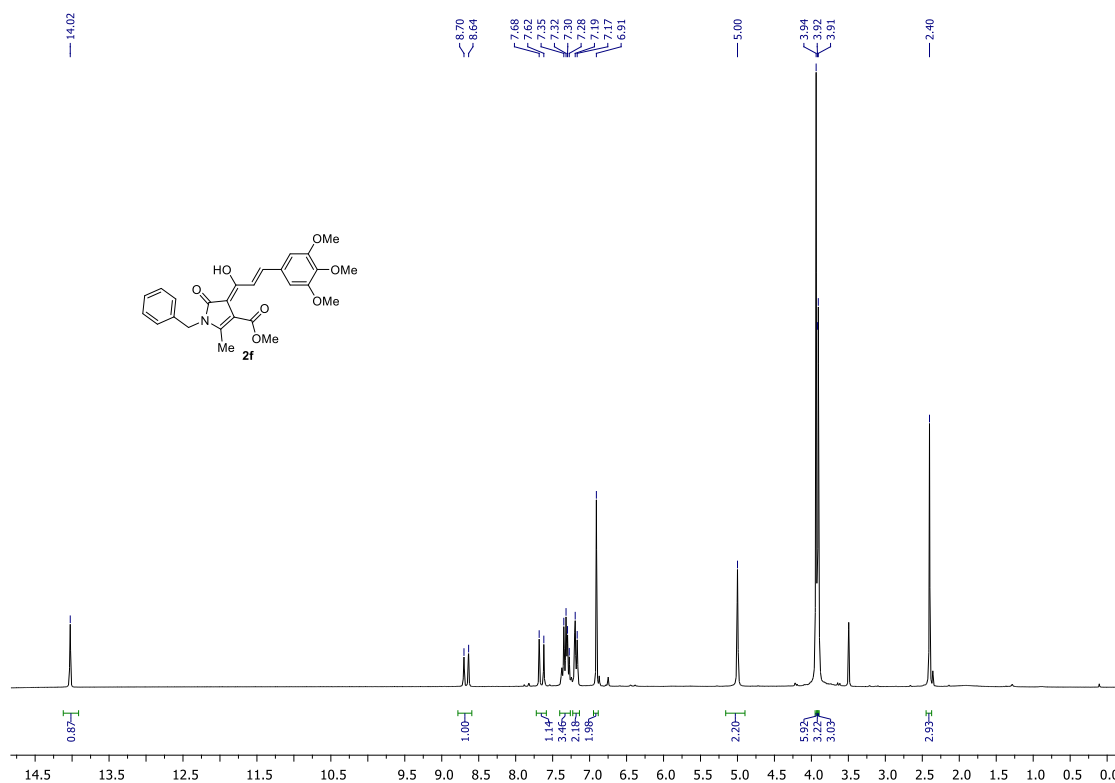

<sup>13</sup>C NMR (63 MHz, CDCl<sub>3</sub>)

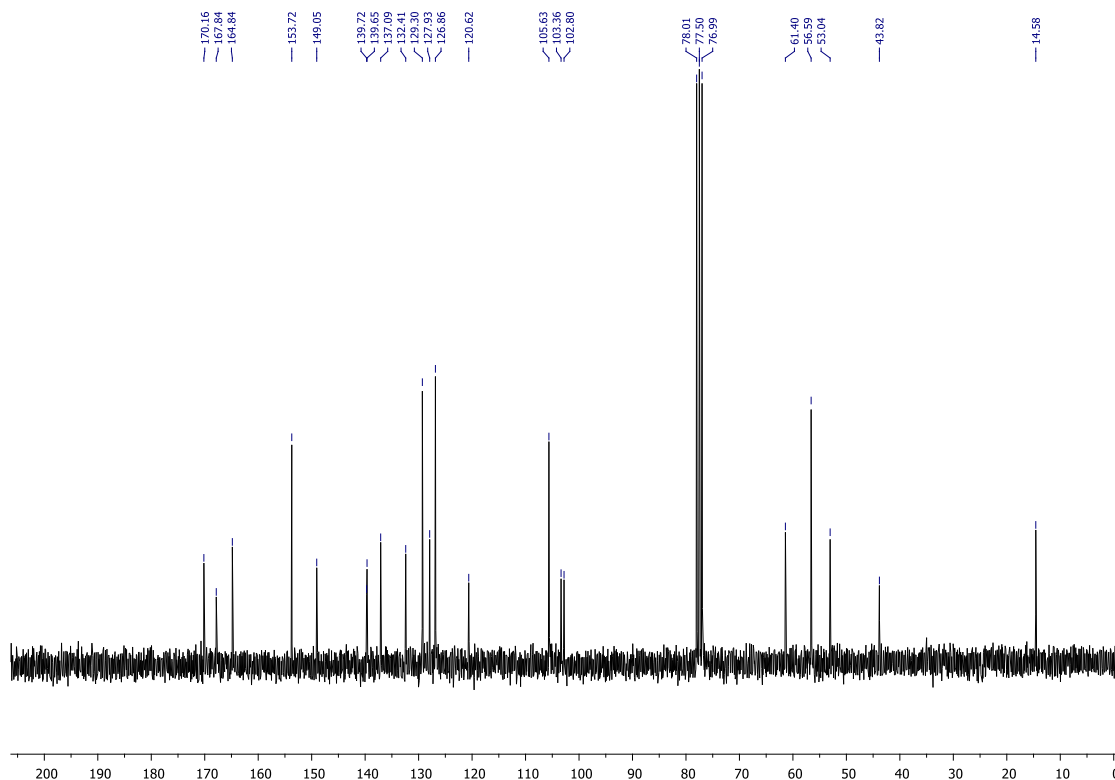

Supplement: s1 [file s1]
